# Supplementary material
Source: publisher figshare collection journal article supplement (https://acs.figshare.com/ndownloader/files/4616650)
Supplement: Supplementary file 1 [file 4616650]

################################################################

#                                                              #

#    get CCDC# xxxxxx (from) deposit@ccdc.cam.ac.uk            #

#       for pre-publication to J. Am. Chem. Soc.               #

#    Compound:  11_PCPIrICCPh (iriccph)                        #

#                                                              #

################################################################

 

data_global 

 

_publ_contact_author_name         'Alan S. Goldman'

_publ_contact_author_address

; 

 Department of Chemistry and Chemical Biology

 Rutgers, The State University of New Jersey

 610 Taylor Road

 Piscataway, New Jersey  08854-8087  U.S.A. 

; 

_publ_contact_author_email     'alan.goldman@rutgers.edu'

_publ_requested_journal           'J. Am. Chem. Soc.'

_publ_section_title 

;

Combined Experimental and Computational Studies on Carbon-Carbon 

Reductive Elimination from Bis(hydrocarbyl) Complexes of (PCP)Ir

;

loop_ 

 _publ_author_name 

 _publ_author_address 

'Rajshekhar Ghosh'

; 

 Department of Chemistry and Chemical Biology 

 Rutgers, The State University of New Jersey

 Piscataway, New Jersey  08854-8087  U.S.A. 

; 

'Thomas J. Emge'

; 

 Department of Chemistry and Chemical Biology 

 Rutgers, The State University of New Jersey

 Piscataway, New Jersey  08854-8087  U.S.A. 

; 

'Karsten Krogh-Jespersen'

; 

 Department of Chemistry and Chemical Biology 

 Rutgers, The State University of New Jersey

 Piscataway, New Jersey  08854-8087  U.S.A. 

; 

'Alan S. Goldman'

; 

 Department of Chemistry and Chemical Biology 

 Rutgers, The State University of New Jersey

 Piscataway, New Jersey  08854-8087  U.S.A. 

; 

  


  

data_iriccph 

  

_audit_creation_method            SHELXL-97 

_chemical_name_systematic 

; 

 ? 

; 

_chemical_name_common             ? 

_chemical_melting_point           ? 

_chemical_formula_moiety          ? 

_chemical_formula_sum        'C32 H48 I Ir P2' 

_chemical_formula_weight          813.74 

  

loop_ 

 _atom_type_symbol 

 _atom_type_description 

 _atom_type_scat_dispersion_real 

 _atom_type_scat_dispersion_imag 

 _atom_type_scat_source 

 'C'  'C'   0.0033   0.0016 

 'International Tables Vol C Tables 4.2.6.8 and 6.1.1.4' 

 'H'  'H'   0.0000   0.0000 

 'International Tables Vol C Tables 4.2.6.8 and 6.1.1.4' 

 'P'  'P'   0.1023   0.0942 

 'International Tables Vol C Tables 4.2.6.8 and 6.1.1.4' 

 'I'  'I'  -0.4742   1.8119 

 'International Tables Vol C Tables 4.2.6.8 and 6.1.1.4' 

 'Ir'  'Ir'  -1.4442   7.9887 

 'International Tables Vol C Tables 4.2.6.8 and 6.1.1.4' 

  

_symmetry_cell_setting            Monoclinic 

_symmetry_space_group_name_H-M    P2(1)/n 

  

loop_ 

 _symmetry_equiv_pos_as_xyz 

 'x, y, z' 

 '-x+1/2, y+1/2, -z+1/2' 

 '-x, -y, -z' 

 'x-1/2, -y-1/2, z-1/2' 

  

_cell_length_a                    13.2440(6) 

_cell_length_b                    15.2021(7) 

_cell_length_c                    16.7996(8) 

_cell_angle_alpha                 90.00 

_cell_angle_beta                  110.383(1) 

_cell_angle_gamma                 90.00 

_cell_volume                      3170.6(3) 

_cell_formula_units_Z             4 

_cell_measurement_temperature     100(2) 

_cell_measurement_reflns_used     8874 

_cell_measurement_theta_min       2.76 

_cell_measurement_theta_max       30.52 

  

_exptl_crystal_description        lathe 

_exptl_crystal_colour             black 

_exptl_crystal_size_max           0.20 

_exptl_crystal_size_mid           0.18 

_exptl_crystal_size_min           0.10 

_exptl_crystal_density_meas       ?

_exptl_crystal_density_diffrn     1.705 

_exptl_crystal_density_method     'not measured' 

_exptl_crystal_F_000              1600 

_exptl_absorpt_coefficient_mu     5.305 

_exptl_absorpt_correction_type    'multi-scan'

_exptl_absorpt_correction_T_min   0.8237

_exptl_absorpt_correction_T_max   0.9999

_exptl_absorpt_process_details    'Bruker SAINT (SADABS)'

  

_exptl_special_details 

; 

 ? 

; 

  

_diffrn_ambient_temperature       100(2) 

_diffrn_radiation_wavelength      0.71073 

_diffrn_radiation_type            MoK\a 

_diffrn_radiation_source          'fine-focus sealed tube' 

_diffrn_radiation_monochromator   graphite 

_diffrn_measurement_device_type   'CCD area detector' 

_diffrn_measurement_method        'phi and omega scans' 

_diffrn_detector_area_resol_mean  ? 

_diffrn_standards_number          0

_diffrn_standards_interval_count  ? 

_diffrn_standards_interval_time   0 

_diffrn_standards_decay_%         0 

_diffrn_reflns_number             38358 

_diffrn_reflns_av_R_equivalents   0.0191 

_diffrn_reflns_av_sigmaI/netI     0.0180 

_diffrn_reflns_limit_h_min        -18 

_diffrn_reflns_limit_h_max        18 

_diffrn_reflns_limit_k_min        -21 

_diffrn_reflns_limit_k_max        21 

_diffrn_reflns_limit_l_min        -23 

_diffrn_reflns_limit_l_max        24 

_diffrn_reflns_theta_min          1.86 

_diffrn_reflns_theta_max          30.55 

_reflns_number_total              9666 

_reflns_number_gt                 9055 

_reflns_threshold_expression      >2sigma(I) 

  

_computing_data_collection        'Bruker SMART' 

_computing_cell_refinement        'Bruker SMART' 

_computing_data_reduction         'Bruker SAINT' 

_computing_structure_solution     'SHELXS-97 (Sheldrick, 1990)' 

_computing_structure_refinement   'SHELXL-97 (Sheldrick, 1997)' 

_computing_molecular_graphics     'Bruker SHELXTL' 

_computing_publication_material   'Bruker SHELXTL' 

  

_refine_special_details 

; 

 Refinement of F^2^ against ALL reflections.  The weighted R-factor wR and 

 goodness of fit S are based on F^2^, conventional R-factors R are based 

 on F, with F set to zero for negative F^2^. The threshold expression of 

 F^2^ > 2sigma(F^2^) is used only for calculating R-factors(gt) etc. and is 

 not relevant to the choice of reflections for refinement.  R-factors based 

 on F^2^ are statistically about twice as large as those based on F, and R- 

 factors based on ALL data will be even larger. 

; 

  

_refine_ls_structure_factor_coef  Fsqd 

_refine_ls_matrix_type            full 

_refine_ls_weighting_scheme       calc 

_refine_ls_weighting_details 

 'calc w=1/[\s^2^(Fo^2^)+(0.0160P)^2^+3.1000P] where P=(Fo^2^+2Fc^2^)/3' 

_atom_sites_solution_primary      direct 

_atom_sites_solution_secondary    difmap 

_atom_sites_solution_hydrogens    geom 

_refine_ls_hydrogen_treatment     constr 

_refine_ls_extinction_method      none 

_refine_ls_extinction_coef        ? 

_refine_ls_number_reflns          9666 

_refine_ls_number_parameters      337 

_refine_ls_number_restraints      0 

_refine_ls_R_factor_all           0.0190 

_refine_ls_R_factor_gt            0.0171 

_refine_ls_wR_factor_ref          0.0390 

_refine_ls_wR_factor_gt           0.0384 

_refine_ls_goodness_of_fit_ref    0.998 

_refine_ls_restrained_S_all       0.998 

_refine_ls_shift/su_max           0.004 

_refine_ls_shift/su_mean          0.000 

  

loop_ 

 _atom_site_label 

 _atom_site_type_symbol 

 _atom_site_fract_x 

 _atom_site_fract_y 

 _atom_site_fract_z 

 _atom_site_U_iso_or_equiv 

 _atom_site_adp_type 

 _atom_site_occupancy 

 _atom_site_symmetry_multiplicity 

 _atom_site_calc_flag 

 _atom_site_refinement_flags 

 _atom_site_disorder_assembly 

 _atom_site_disorder_group 

Ir1 Ir 0.308001(5) 0.329547(4) 0.123987(4) 0.00970(2) Uani 1 1 d . . . 

I1 I 0.389294(9) 0.165564(7) 0.178043(7) 0.01441(3) Uani 1 1 d . . . 

P1 P 0.34502(3) 0.32230(3) -0.00225(3) 0.01151(8) Uani 1 1 d . . . 

P2 P 0.22011(4) 0.35913(3) 0.22180(3) 0.01262(8) Uani 1 1 d . . . 

C1 C 0.24428(13) 0.44850(11) 0.07539(10) 0.0121(3) Uani 1 1 d . . . 

C2 C 0.27134(13) 0.48732(11) 0.00902(11) 0.0134(3) Uani 1 1 d . . . 

C3 C 0.22747(15) 0.56804(12) -0.02544(11) 0.0163(3) Uani 1 1 d . . . 

H3 H 0.2451 0.5925 -0.0710 0.020 Uiso 1 1 calc R . . 

C4 C 0.15827(15) 0.61304(12) 0.00617(12) 0.0168(3) Uani 1 1 d . . . 

H4 H 0.1300 0.6687 -0.0167 0.020 Uiso 1 1 calc R . . 

C5 C 0.13066(14) 0.57615(11) 0.07153(11) 0.0153(3) Uani 1 1 d . . . 

H5 H 0.0828 0.6065 0.0930 0.018 Uiso 1 1 calc R . . 

C6 C 0.17281(13) 0.49486(11) 0.10580(10) 0.0131(3) Uani 1 1 d . . . 

C7 C 0.34783(14) 0.44013(11) -0.02475(11) 0.0150(3) Uani 1 1 d . . . 

H7A H 0.4217 0.4634 0.0026 0.018 Uiso 1 1 calc R . . 

H7B H 0.3262 0.4497 -0.0868 0.018 Uiso 1 1 calc R . . 

C8 C 0.13536(15) 0.45415(12) 0.17233(12) 0.0173(3) Uani 1 1 d . . . 

H8A H 0.0595 0.4349 0.1460 0.021 Uiso 1 1 calc R . . 

H8B H 0.1388 0.4984 0.2164 0.021 Uiso 1 1 calc R . . 

C9 C 0.22417(14) 0.27535(12) -0.08854(11) 0.0157(3) Uani 1 1 d . . . 

C10 C 0.23468(16) 0.27874(14) -0.17669(12) 0.0220(4) Uani 1 1 d . . . 

H10A H 0.2931 0.2397 -0.1777 0.033 Uiso 1 1 calc R . . 

H10B H 0.2507 0.3391 -0.1890 0.033 Uiso 1 1 calc R . . 

H10C H 0.1669 0.2595 -0.2197 0.033 Uiso 1 1 calc R . . 

C11 C 0.12489(15) 0.33072(13) -0.09307(12) 0.0206(4) Uani 1 1 d . . . 

H11A H 0.0605 0.3055 -0.1356 0.031 Uiso 1 1 calc R . . 

H11B H 0.1348 0.3913 -0.1090 0.031 Uiso 1 1 calc R . . 

H11C H 0.1162 0.3306 -0.0375 0.031 Uiso 1 1 calc R . . 

C12 C 0.20297(16) 0.18033(13) -0.06711(12) 0.0199(4) Uani 1 1 d . . . 

H12A H 0.1383 0.1578 -0.1114 0.030 Uiso 1 1 calc R . . 

H12B H 0.1923 0.1793 -0.0123 0.030 Uiso 1 1 calc R . . 

H12C H 0.2648 0.1434 -0.0641 0.030 Uiso 1 1 calc R . . 

C13 C 0.47300(14) 0.27878(12) -0.01287(11) 0.0139(3) Uani 1 1 d . . . 

C14 C 0.46815(15) 0.17929(12) -0.02983(12) 0.0178(3) Uani 1 1 d . . . 

H14A H 0.5395 0.1582 -0.0263 0.027 Uiso 1 1 calc R . . 

H14B H 0.4162 0.1673 -0.0867 0.027 Uiso 1 1 calc R . . 

H14C H 0.4456 0.1489 0.0126 0.027 Uiso 1 1 calc R . . 

C15 C 0.49963(16) 0.32704(13) -0.08383(12) 0.0201(4) Uani 1 1 d . . . 

H15A H 0.5661 0.3029 -0.0882 0.030 Uiso 1 1 calc R . . 

H15B H 0.5093 0.3899 -0.0704 0.030 Uiso 1 1 calc R . . 

H15C H 0.4404 0.3190 -0.1380 0.030 Uiso 1 1 calc R . . 

C16 C 0.56522(14) 0.29630(13) 0.07104(12) 0.0176(3) Uani 1 1 d . . . 

H16A H 0.5516 0.2646 0.1171 0.026 Uiso 1 1 calc R . . 

H16B H 0.5698 0.3595 0.0832 0.026 Uiso 1 1 calc R . . 

H16C H 0.6332 0.2760 0.0665 0.026 Uiso 1 1 calc R . . 

C17 C 0.11695(14) 0.27163(12) 0.21630(11) 0.0154(3) Uani 1 1 d . . . 

C18 C 0.08025(15) 0.23819(14) 0.12387(12) 0.0211(4) Uani 1 1 d . . . 

H18A H 0.1406 0.2088 0.1138 0.032 Uiso 1 1 calc R . . 

H18B H 0.0561 0.2881 0.0849 0.032 Uiso 1 1 calc R . . 

H18C H 0.0208 0.1965 0.1142 0.032 Uiso 1 1 calc R . . 

C19 C 0.01739(15) 0.30495(13) 0.23448(13) 0.0200(4) Uani 1 1 d . . . 

H19A H -0.0315 0.2556 0.2314 0.030 Uiso 1 1 calc R . . 

H19B H -0.0198 0.3495 0.1923 0.030 Uiso 1 1 calc R . . 

H19C H 0.0401 0.3310 0.2914 0.030 Uiso 1 1 calc R . . 

C20 C 0.16739(15) 0.19481(12) 0.27616(12) 0.0180(3) Uani 1 1 d . . . 

H20A H 0.1878 0.2146 0.3352 0.027 Uiso 1 1 calc R . . 

H20B H 0.2316 0.1740 0.2655 0.027 Uiso 1 1 calc R . . 

H20C H 0.1151 0.1468 0.2660 0.027 Uiso 1 1 calc R . . 

C21 C 0.29785(15) 0.39199(12) 0.33397(11) 0.0160(3) Uani 1 1 d . . . 

C22 C 0.34648(17) 0.48331(13) 0.33029(13) 0.0219(4) Uani 1 1 d . . . 

H22A H 0.2889 0.5274 0.3136 0.033 Uiso 1 1 calc R . . 

H22B H 0.3829 0.4824 0.2886 0.033 Uiso 1 1 calc R . . 

H22C H 0.3985 0.4982 0.3863 0.033 Uiso 1 1 calc R . . 

C23 C 0.22870(17) 0.39917(14) 0.39067(12) 0.0223(4) Uani 1 1 d . . . 

H23A H 0.2033 0.3406 0.3991 0.034 Uiso 1 1 calc R . . 

H23B H 0.1667 0.4374 0.3633 0.034 Uiso 1 1 calc R . . 

H23C H 0.2720 0.4242 0.4458 0.034 Uiso 1 1 calc R . . 

C24 C 0.39007(16) 0.32628(13) 0.37153(12) 0.0201(4) Uani 1 1 d . . . 

H24A H 0.4348 0.3454 0.4286 0.030 Uiso 1 1 calc R . . 

H24B H 0.4341 0.3235 0.3353 0.030 Uiso 1 1 calc R . . 

H24C H 0.3602 0.2679 0.3747 0.030 Uiso 1 1 calc R . . 

C25 C 0.43816(14) 0.39433(12) 0.18028(11) 0.0138(3) Uani 1 1 d . . . 

C26 C 0.52046(15) 0.43472(12) 0.21448(11) 0.0161(3) Uani 1 1 d . . . 

C27 C 0.62190(14) 0.47741(12) 0.25779(11) 0.0151(3) Uani 1 1 d . . . 

C28 C 0.71651(14) 0.44923(13) 0.24630(11) 0.0174(3) Uani 1 1 d . . . 

H28 H 0.7135 0.4018 0.2087 0.021 Uiso 1 1 calc R . . 

C29 C 0.81466(15) 0.48938(14) 0.28896(12) 0.0225(4) Uani 1 1 d . . . 

H29 H 0.8779 0.4696 0.2800 0.027 Uiso 1 1 calc R . . 

C30 C 0.82061(17) 0.55832(15) 0.34459(13) 0.0267(4) Uani 1 1 d . . . 

H30 H 0.8878 0.5856 0.3741 0.032 Uiso 1 1 calc R . . 

C31 C 0.72801(18) 0.58695(15) 0.35670(14) 0.0280(4) Uani 1 1 d . . . 

H31 H 0.7318 0.6341 0.3947 0.034 Uiso 1 1 calc R . . 

C32 C 0.62929(16) 0.54734(13) 0.31368(13) 0.0222(4) Uani 1 1 d . . . 

H32 H 0.5662 0.5680 0.3224 0.027 Uiso 1 1 calc R . . 

  

loop_ 

 _atom_site_aniso_label 

 _atom_site_aniso_U_11 

 _atom_site_aniso_U_22 

 _atom_site_aniso_U_33 

 _atom_site_aniso_U_23 

 _atom_site_aniso_U_13 

 _atom_site_aniso_U_12 

Ir1 0.00954(3) 0.01047(3) 0.00984(3) 0.00068(2) 0.00434(2) 0.00029(2) 

I1 0.01494(5) 0.01291(5) 0.01699(5) 0.00350(4) 0.00760(4) 0.00253(4) 

P1 0.01158(19) 0.01344(19) 0.01018(18) -0.00044(14) 0.00464(15) 0.00045(15) 

P2 0.01341(19) 0.0142(2) 0.01234(19) 0.00223(15) 0.00719(15) 0.00227(16) 

C1 0.0109(7) 0.0134(7) 0.0110(7) -0.0005(6) 0.0026(6) -0.0012(6) 

C2 0.0133(7) 0.0140(8) 0.0132(7) 0.0012(6) 0.0048(6) 0.0006(6) 

C3 0.0176(8) 0.0160(8) 0.0163(8) 0.0036(6) 0.0071(7) -0.0001(6) 

C4 0.0174(8) 0.0129(8) 0.0191(8) 0.0046(6) 0.0049(7) 0.0020(6) 

C5 0.0138(8) 0.0142(8) 0.0179(8) 0.0003(6) 0.0057(6) 0.0022(6) 

C6 0.0132(7) 0.0135(7) 0.0130(7) 0.0001(6) 0.0052(6) 0.0003(6) 

C7 0.0179(8) 0.0152(8) 0.0150(8) 0.0023(6) 0.0097(6) 0.0007(6) 

C8 0.0186(8) 0.0178(8) 0.0194(8) 0.0059(7) 0.0117(7) 0.0068(7) 

C9 0.0146(8) 0.0187(8) 0.0127(8) -0.0031(6) 0.0035(6) 0.0000(6) 

C10 0.0231(9) 0.0283(10) 0.0133(8) -0.0027(7) 0.0047(7) 0.0018(8) 

C11 0.0136(8) 0.0265(10) 0.0189(9) -0.0050(7) 0.0021(7) 0.0017(7) 

C12 0.0185(8) 0.0219(9) 0.0187(9) -0.0054(7) 0.0057(7) -0.0046(7) 

C13 0.0130(7) 0.0170(8) 0.0140(8) -0.0011(6) 0.0076(6) 0.0003(6) 

C14 0.0178(8) 0.0179(8) 0.0190(8) -0.0022(7) 0.0083(7) 0.0026(7) 

C15 0.0220(9) 0.0243(9) 0.0185(9) 0.0007(7) 0.0128(7) 0.0005(7) 

C16 0.0140(8) 0.0223(9) 0.0175(8) -0.0015(7) 0.0067(6) -0.0005(7) 

C17 0.0131(8) 0.0186(8) 0.0166(8) 0.0020(6) 0.0078(6) 0.0003(6) 

C18 0.0169(8) 0.0271(10) 0.0192(9) -0.0024(7) 0.0060(7) -0.0012(7) 

C19 0.0162(8) 0.0249(9) 0.0227(9) 0.0031(7) 0.0116(7) 0.0018(7) 

C20 0.0193(8) 0.0170(8) 0.0204(9) 0.0028(7) 0.0101(7) -0.0004(7) 

C21 0.0178(8) 0.0165(8) 0.0154(8) -0.0006(6) 0.0079(6) -0.0005(6) 

C22 0.0260(10) 0.0176(9) 0.0263(10) -0.0042(7) 0.0144(8) -0.0023(7) 

C23 0.0276(10) 0.0259(10) 0.0176(9) -0.0032(7) 0.0131(8) -0.0015(8) 

C24 0.0199(9) 0.0218(9) 0.0164(8) 0.0000(7) 0.0035(7) 0.0010(7) 

C25 0.0158(8) 0.0156(8) 0.0115(7) 0.0009(6) 0.0068(6) 0.0021(6) 

C26 0.0161(8) 0.0177(8) 0.0152(8) 0.0004(6) 0.0065(6) -0.0001(6) 

C27 0.0144(8) 0.0165(8) 0.0134(7) 0.0017(6) 0.0034(6) -0.0029(6) 

C28 0.0151(8) 0.0199(9) 0.0158(8) 0.0018(6) 0.0037(6) -0.0012(7) 

C29 0.0147(8) 0.0290(10) 0.0225(9) 0.0047(8) 0.0047(7) -0.0024(7) 

C30 0.0206(9) 0.0336(11) 0.0201(9) 0.0010(8) -0.0004(7) -0.0127(8) 

C31 0.0313(11) 0.0275(11) 0.0222(10) -0.0079(8) 0.0053(8) -0.0114(9) 

C32 0.0206(9) 0.0235(10) 0.0225(9) -0.0048(7) 0.0073(7) -0.0042(7) 

  

_geom_special_details 

; 

 All esds (except the esd in the dihedral angle between two l.s. planes) 

 are estimated using the full covariance matrix.  The cell esds are taken 

 into account individually in the estimation of esds in distances, angles 

 and torsion angles; correlations between esds in cell parameters are only 

 used when they are defined by crystal symmetry.  An approximate (isotropic) 

 treatment of cell esds is used for estimating esds involving l.s. planes. 

; 

  

loop_ 

 _geom_bond_atom_site_label_1 

 _geom_bond_atom_site_label_2 

 _geom_bond_distance 

 _geom_bond_site_symmetry_2 

 _geom_bond_publ_flag 

Ir1 C25 1.9236(18) . ? 

Ir1 C1 2.0417(17) . ? 

Ir1 P1 2.3397(4) . ? 

Ir1 P2 2.3643(4) . ? 

Ir1 I1 2.74175(16) . ? 

P1 C7 1.8338(18) . ? 

P1 C13 1.8850(17) . ? 

P1 C9 1.8858(18) . ? 

P2 C8 1.8404(18) . ? 

P2 C21 1.8733(18) . ? 

P2 C17 1.8859(18) . ? 

C1 C6 1.411(2) . ? 

C1 C2 1.414(2) . ? 

C2 C3 1.394(2) . ? 

C2 C7 1.504(2) . ? 

C3 C4 1.389(3) . ? 

C4 C5 1.391(2) . ? 

C5 C6 1.395(2) . ? 

C6 C8 1.505(2) . ? 

C9 C10 1.536(3) . ? 

C9 C12 1.538(3) . ? 

C9 C11 1.541(3) . ? 

C13 C16 1.533(2) . ? 

C13 C14 1.536(2) . ? 

C13 C15 1.542(2) . ? 

C17 C20 1.534(3) . ? 

C17 C19 1.539(2) . ? 

C17 C18 1.543(3) . ? 

C21 C24 1.533(3) . ? 

C21 C23 1.538(3) . ? 

C21 C22 1.541(3) . ? 

C25 C26 1.208(2) . ? 

C26 C27 1.440(2) . ? 

C27 C32 1.399(3) . ? 

C27 C28 1.400(3) . ? 

C28 C29 1.388(3) . ? 

C29 C30 1.388(3) . ? 

C30 C31 1.382(3) . ? 

C31 C32 1.391(3) . ? 

  

loop_ 

 _geom_angle_atom_site_label_1 

 _geom_angle_atom_site_label_2 

 _geom_angle_atom_site_label_3 

 _geom_angle 

 _geom_angle_site_symmetry_1 

 _geom_angle_site_symmetry_3 

 _geom_angle_publ_flag 

C25 Ir1 C1 85.29(7) . . ? 

C25 Ir1 P1 92.00(5) . . ? 

C1 Ir1 P1 82.37(5) . . ? 

C25 Ir1 P2 97.75(5) . . ? 

C1 Ir1 P2 82.79(5) . . ? 

P1 Ir1 P2 161.484(16) . . ? 

C25 Ir1 I1 96.97(5) . . ? 

C1 Ir1 I1 176.07(5) . . ? 

P1 Ir1 I1 94.320(11) . . ? 

P2 Ir1 I1 100.042(11) . . ? 

C7 P1 C13 103.87(8) . . ? 

C7 P1 C9 106.50(8) . . ? 

C13 P1 C9 110.17(8) . . ? 

C7 P1 Ir1 99.59(6) . . ? 

C13 P1 Ir1 125.56(6) . . ? 

C9 P1 Ir1 108.96(6) . . ? 

C8 P2 C21 106.26(9) . . ? 

C8 P2 C17 102.36(8) . . ? 

C21 P2 C17 111.86(8) . . ? 

C8 P2 Ir1 101.88(6) . . ? 

C21 P2 Ir1 121.24(6) . . ? 

C17 P2 Ir1 110.82(6) . . ? 

C6 C1 C2 117.60(15) . . ? 

C6 C1 Ir1 122.25(12) . . ? 

C2 C1 Ir1 120.14(12) . . ? 

C3 C2 C1 120.76(16) . . ? 

C3 C2 C7 120.07(15) . . ? 

C1 C2 C7 119.17(15) . . ? 

C4 C3 C2 120.65(16) . . ? 

C3 C4 C5 119.55(16) . . ? 

C4 C5 C6 120.37(16) . . ? 

C5 C6 C1 121.04(16) . . ? 

C5 C6 C8 118.87(15) . . ? 

C1 C6 C8 119.98(15) . . ? 

C2 C7 P1 108.87(12) . . ? 

C6 C8 P2 110.57(12) . . ? 

C10 C9 C12 110.03(15) . . ? 

C10 C9 C11 107.25(15) . . ? 

C12 C9 C11 107.60(16) . . ? 

C10 C9 P1 113.01(13) . . ? 

C12 C9 P1 110.53(12) . . ? 

C11 C9 P1 108.20(12) . . ? 

C16 C13 C14 108.06(15) . . ? 

C16 C13 C15 107.74(15) . . ? 

C14 C13 C15 109.34(15) . . ? 

C16 C13 P1 107.85(12) . . ? 

C14 C13 P1 112.47(12) . . ? 

C15 C13 P1 111.20(12) . . ? 

C20 C17 C19 109.15(15) . . ? 

C20 C17 C18 108.76(15) . . ? 

C19 C17 C18 108.47(15) . . ? 

C20 C17 P2 111.23(12) . . ? 

C19 C17 P2 114.46(13) . . ? 

C18 C17 P2 104.51(12) . . ? 

C24 C21 C23 110.61(16) . . ? 

C24 C21 C22 108.62(15) . . ? 

C23 C21 C22 107.96(15) . . ? 

C24 C21 P2 108.68(12) . . ? 

C23 C21 P2 113.87(13) . . ? 

C22 C21 P2 106.91(13) . . ? 

C26 C25 Ir1 178.89(16) . . ? 

C25 C26 C27 176.16(19) . . ? 

C32 C27 C28 117.93(17) . . ? 

C32 C27 C26 121.09(17) . . ? 

C28 C27 C26 120.97(17) . . ? 

C29 C28 C27 121.10(18) . . ? 

C28 C29 C30 120.19(19) . . ? 

C31 C30 C29 119.47(18) . . ? 

C30 C31 C32 120.6(2) . . ? 

C31 C32 C27 120.72(19) . . ? 

  

loop_ 

 _geom_torsion_atom_site_label_1 

 _geom_torsion_atom_site_label_2 

 _geom_torsion_atom_site_label_3 

 _geom_torsion_atom_site_label_4 

 _geom_torsion 

 _geom_torsion_site_symmetry_1 

 _geom_torsion_site_symmetry_2 

 _geom_torsion_site_symmetry_3 

 _geom_torsion_site_symmetry_4 

 _geom_torsion_publ_flag 

C25 Ir1 P1 C7 -60.61(8) . . . . ? 

C1 Ir1 P1 C7 24.37(7) . . . . ? 

P2 Ir1 P1 C7 61.33(8) . . . . ? 

I1 Ir1 P1 C7 -157.76(6) . . . . ? 

C25 Ir1 P1 C13 54.21(9) . . . . ? 

C1 Ir1 P1 C13 139.19(8) . . . . ? 

P2 Ir1 P1 C13 176.15(8) . . . . ? 

I1 Ir1 P1 C13 -42.94(7) . . . . ? 

C25 Ir1 P1 C9 -171.86(8) . . . . ? 

C1 Ir1 P1 C9 -86.89(8) . . . . ? 

P2 Ir1 P1 C9 -49.93(8) . . . . ? 

I1 Ir1 P1 C9 90.99(6) . . . . ? 

C25 Ir1 P2 C8 95.54(8) . . . . ? 

C1 Ir1 P2 C8 11.32(8) . . . . ? 

P1 Ir1 P2 C8 -25.60(9) . . . . ? 

I1 Ir1 P2 C8 -165.92(7) . . . . ? 

C25 Ir1 P2 C21 -22.01(9) . . . . ? 

C1 Ir1 P2 C21 -106.22(8) . . . . ? 

P1 Ir1 P2 C21 -143.14(8) . . . . ? 

I1 Ir1 P2 C21 76.54(7) . . . . ? 

C25 Ir1 P2 C17 -156.16(8) . . . . ? 

C1 Ir1 P2 C17 119.62(8) . . . . ? 

P1 Ir1 P2 C17 82.70(8) . . . . ? 

I1 Ir1 P2 C17 -57.62(6) . . . . ? 

C25 Ir1 C1 C6 -104.39(14) . . . . ? 

P1 Ir1 C1 C6 162.95(14) . . . . ? 

P2 Ir1 C1 C6 -5.95(13) . . . . ? 

I1 Ir1 C1 C6 130.3(6) . . . . ? 

C25 Ir1 C1 C2 75.57(14) . . . . ? 

P1 Ir1 C1 C2 -17.09(12) . . . . ? 

P2 Ir1 C1 C2 174.01(13) . . . . ? 

I1 Ir1 C1 C2 -49.8(7) . . . . ? 

C6 C1 C2 C3 -0.8(2) . . . . ? 

Ir1 C1 C2 C3 179.25(13) . . . . ? 

C6 C1 C2 C7 179.65(15) . . . . ? 

Ir1 C1 C2 C7 -0.3(2) . . . . ? 

C1 C2 C3 C4 1.6(3) . . . . ? 

C7 C2 C3 C4 -178.85(17) . . . . ? 

C2 C3 C4 C5 -1.5(3) . . . . ? 

C3 C4 C5 C6 0.6(3) . . . . ? 

C4 C5 C6 C1 0.2(3) . . . . ? 

C4 C5 C6 C8 -175.91(17) . . . . ? 

C2 C1 C6 C5 -0.1(2) . . . . ? 

Ir1 C1 C6 C5 179.85(13) . . . . ? 

C2 C1 C6 C8 175.98(15) . . . . ? 

Ir1 C1 C6 C8 -4.1(2) . . . . ? 

C3 C2 C7 P1 -155.94(14) . . . . ? 

C1 C2 C7 P1 23.6(2) . . . . ? 

C13 P1 C7 C2 -161.53(12) . . . . ? 

C9 P1 C7 C2 82.14(13) . . . . ? 

Ir1 P1 C7 C2 -31.04(12) . . . . ? 

C5 C6 C8 P2 -169.20(13) . . . . ? 

C1 C6 C8 P2 14.6(2) . . . . ? 

C21 P2 C8 C6 111.62(13) . . . . ? 

C17 P2 C8 C6 -130.92(13) . . . . ? 

Ir1 P2 C8 C6 -16.22(14) . . . . ? 

C7 P1 C9 C10 66.09(15) . . . . ? 

C13 P1 C9 C10 -45.95(15) . . . . ? 

Ir1 P1 C9 C10 172.67(12) . . . . ? 

C7 P1 C9 C12 -170.11(12) . . . . ? 

C13 P1 C9 C12 77.86(14) . . . . ? 

Ir1 P1 C9 C12 -63.52(13) . . . . ? 

C7 P1 C9 C11 -52.52(14) . . . . ? 

C13 P1 C9 C11 -164.55(12) . . . . ? 

Ir1 P1 C9 C11 54.07(13) . . . . ? 

C7 P1 C13 C16 82.51(13) . . . . ? 

C9 P1 C13 C16 -163.77(12) . . . . ? 

Ir1 P1 C13 C16 -30.29(15) . . . . ? 

C7 P1 C13 C14 -158.44(13) . . . . ? 

C9 P1 C13 C14 -44.72(15) . . . . ? 

Ir1 P1 C13 C14 88.76(13) . . . . ? 

C7 P1 C13 C15 -35.42(14) . . . . ? 

C9 P1 C13 C15 78.30(14) . . . . ? 

Ir1 P1 C13 C15 -148.22(10) . . . . ? 

C8 P2 C17 C20 -163.68(13) . . . . ? 

C21 P2 C17 C20 -50.30(15) . . . . ? 

Ir1 P2 C17 C20 88.33(12) . . . . ? 

C8 P2 C17 C19 -39.38(15) . . . . ? 

C21 P2 C17 C19 74.00(15) . . . . ? 

Ir1 P2 C17 C19 -147.37(12) . . . . ? 

C8 P2 C17 C18 79.13(13) . . . . ? 

C21 P2 C17 C18 -167.49(12) . . . . ? 

Ir1 P2 C17 C18 -28.86(13) . . . . ? 

C8 P2 C21 C24 -165.54(13) . . . . ? 

C17 P2 C21 C24 83.53(14) . . . . ? 

Ir1 P2 C21 C24 -50.20(14) . . . . ? 

C8 P2 C21 C23 70.68(15) . . . . ? 

C17 P2 C21 C23 -40.25(16) . . . . ? 

Ir1 P2 C21 C23 -173.98(11) . . . . ? 

C8 P2 C21 C22 -48.46(14) . . . . ? 

C17 P2 C21 C22 -159.39(12) . . . . ? 

Ir1 P2 C21 C22 66.87(13) . . . . ? 

C1 Ir1 C25 C26 -93(9) . . . . ? 

P1 Ir1 C25 C26 -11(9) . . . . ? 

P2 Ir1 C25 C26 -175(100) . . . . ? 

I1 Ir1 C25 C26 84(9) . . . . ? 

Ir1 C25 C26 C27 -88(9) . . . . ? 

C25 C26 C27 C32 -123(3) . . . . ? 

C25 C26 C27 C28 56(3) . . . . ? 

C32 C27 C28 C29 0.0(3) . . . . ? 

C26 C27 C28 C29 -179.00(17) . . . . ? 

C27 C28 C29 C30 0.4(3) . . . . ? 

C28 C29 C30 C31 -0.4(3) . . . . ? 

C29 C30 C31 C32 0.0(3) . . . . ? 

C30 C31 C32 C27 0.4(3) . . . . ? 

C28 C27 C32 C31 -0.4(3) . . . . ? 

C26 C27 C32 C31 178.56(19) . . . . ? 

  

_diffrn_measured_fraction_theta_max    0.997 

_diffrn_reflns_theta_full              30.55 

_diffrn_measured_fraction_theta_full   0.997 

_refine_diff_density_max    1.253 

_refine_diff_density_min   -0.330 

_refine_diff_density_rms    0.086 

#==END
